# Supplementary material for: Advancing physiology education by understanding the multiple dimensions of homeostasis
Source: Front Physiol. 2023 Aug 11;14:1234214. doi: 10.3389/fphys.2023.1234214 (PMC10450910; doi:10.3389/fphys.2023.1234214)
Supplement: Supplementary file 1 [file Table1.xlsx]

## Sheet: Table 1 as Supplemental File
	A Supplementary Table with a total of 21 definitions of homeostasis collected from textbooks and online teaching resources
		Definition of Homeostasis	Source
	1	"the maintenance of nearly constant conditions in the internal environment."	Guyton and Hall, Textbook of Medical Physiology, 14th EDITION, ELSEVIER
	2	"maintaning a constant internal enviorment"	BRUCE M. KOEPPEN AND BRUCE A. STANTON, Berne & Levy Physiology SIXTH EDITION, P218
	3	"Maintenance of a relatively stable internal environment is termed homeostasis."	Lauralee Sherwood, Human Physiology: From Cells to zSystems, FOURTH EDITION, p5
	4	"Homeostasis is the tendency to resist change in order to maintain a stable, relatively constant internal environment."	https://www.khanacademy.org/science/ap-biology/cell-communication-and-cell-cycle/feedback/a/homeostasis
	5	"Homeostasis is defined as the maintenance of constancy of the internal environment of the body."	Gopal Krushna Pal, Comprehensive Textbook of Medical Physioly, p9
	6	"Homeostasis is the maintenance of the steady state of equilibrium in the internal environment of an animal."	https://www.nzqa.govt.nz/assets/qualifications-and-standards/qualifications/ncea/NCEA-subject-resources/Biology/91604-A/91604-EXP-Student1-001.pdf
	7	"Physiological homeostasis is the tendency of the body to maintain critical physiological parameters (e.g., blood glucose level, blood salinity, blood pressure, core body temperature) of its internal environment within specific ranges of values."	https://link.springer.com/referenceworkentry/10.1007/978-1-4419-1428-6_303
	8	"Homeostasis refers to the natural phenomenon of the body via which the body resists the change in the internal environment, or the body tends to reverse the …"	Study.com
	9	Homeostasis "refers to regulatory mechanisms by which biologic systems tend to maintain the internal stability necessary for surval while adjsting to internal or external threats to that stability."	Leonard R. Johnson, Essential Medical Physiology, THIRD EDITION, p4
	10	"Homeostasis is the maintenance of steady states in the body by coordinated physiologic mechanisms."	Rodney A. Rhoades and David R. Bell, 2013, Medical Physiology: Principles for Clinical Medicine, Fifth EDITION, p20
	11	"the internal stability necessary for survival while	Walter F. Bprpn and Emile L. Boulpaep, Medical Physiology, THIRD EDUTION, ELSEVIER, p4
	12	"Homeostasis is the tendency not to stray from the range of favorable or ideal internal conditions. Such conditions must be kept the same constantly."	https://www.biologyonline.com/dictionary/homeostasis
	13	"Homeostasis (homeo : same/steady, stasis : state) is a phenomenon in which the body regulates its functions to keep the internal conditions as stable as possible."	https://nios.ac.in/media/documents/SrSec314NewE/Lesson-18.pdf
	14	"The word "homeostasis" refers to the equilibrium inside an organism's body. It maintains a controlled internal environment in reaction to alterations in the external world. The main purpose of Homeostasis is to keep the body's internal environment in equilibrium so it can continue to function properly. A complex network of feedback loops achieves Homeostasis."	https://www.javatpoint.com/homeostasis-definition
	15	"homeostasis, any self-regulating process by which biological systems tend to maintain stability while adjusting to conditions that are optimal for survival."	https://www.britannica.com/science/homeostasis
	16	"A state of balance among all the body systems needed for the body to survive and function correctly. In homeostasis, body levels of acid, blood pressure, blood sugar, electrolytes, energy, hormones, oxygen, proteins, and temperature are constantly adjusted to respond to changes inside and outside the body, to keep them at a normal level."	https://www.cancer.gov/publications/dictionaries/cancer-terms/def/homeostasis
	17	"Homeostasis is the state of steady internal chemical and physical conditions maintained by living systems.”	https://byjus.com/biology/homeostasis/
	18	"Homeostasis is the activity of cells throughout the body to maintain the physiological state within a narrow range that is compatible with life."	https://pressbooks-dev.oer.hawaii.edu/anatomyandphysiology/chapter/homeostasis/
	19	Homeostasis means relatively stable internal, physical, and chemical conditions maintained BY LIVING SYSTEMS , including humans.	https://www.quora.com/What-is-the-difference-between-homeostasis-and-a-steady-state
	20	" Homeostasis [1-4] refers to stability, balance, or equilibrium within a cell or the body. Homeostasis is an important characteristic of living things. Maintaining a stable internal environment which requires adjustments as conditions change inside and outside the cell. The maintenance of systems within a cell is called homeostatic regulation. The continuous adjustments are made to meet the Set …	https://www.omicsonline.org/open-access/role-of-homeostasis-in-human-physiology-a-review.php?aid=87462
	21	"Animal organs and organ systems constantly adjust to internal and external changes through a process called homeostasis (“steady state”). These changes might be in the level of glucose or calcium in blood or in external temperatures. Homeostasis means to maintain dynamic equilibrium in the body. It is dynamic because it is constantly adjusting to the changes that the body’s systems encounter. It…	https://opentextbc.ca/biology/chapter/14-3-homeostasis/
